# Supplementary material
Source: PubMed Central journal article supplement (PMC6702039)
Supplement: NIHMS1529752-supplement-1.pdf [file NIHMS1529752-supplement-1.pdf]

**Appendix**  
**Deaf Women's Health: Adherence to Breast and Cervical Cancer Screening Recommendations**  
**Kushalnagar et al.**

**Appendix Table 1.** Summary of Binary Logistic Regression Analysis for Adherence in Deaf Women With Multiple Imputation

| Variable                                | Pap smear adherence <sup>a</sup> | Mammogram adherence <sup>a</sup> |
|-----------------------------------------|----------------------------------|----------------------------------|
|                                         | (n=529)<br>AOR (95% CI)          | (n=324)<br>AOR (95% CI)          |
| Age <sup>b</sup>                        | 0.995 (0.976, 1.014)             | <b>1.077***</b> (1.041, 1.114)   |
| Race/ethnicity <sup>c</sup>             |                                  |                                  |
| Black                                   | 1.523 (0.794, 2.919)             | <b>4.909**</b> (1.637, 14.720)   |
| Hispanic                                | 1.684 (0.870, 3.261)             | 1.559 (0.613, 3.968)             |
| College graduate <sup>c</sup>           | 1.228 (0.758, 1.990)             | 1.204 (0.639, 2.271)             |
| Income <sup>c</sup>                     |                                  |                                  |
| Middle SES                              | 1.068 (0.660, 1.728)             | 0.944 (0.505, 1.764)             |
| Upper SES                               | 0.854 (0.400, 1.820)             | 0.926 (0.348, 2.460)             |
| Marital status <sup>c</sup>             |                                  |                                  |
| In partnership                          | <b>1.899*</b> (1.140, 3.162)     | 1.217 (0.538, 2.755)             |
| Previously in partnership, now single   | <b>2.292*</b> (1.094, 4.805)     | 1.658 (0.796, 3.455)             |
| Health insurance <sup>c</sup>           | 1.985 (0.623, 6.231)             | 0.635 (0.153, 2.625)             |
| Regular provider <sup>c</sup>           | 1.320 (0.850, 2.051)             | 1.446 (0.807, 2.590)             |
| Personal history of cancer <sup>c</sup> | 1.468 (0.666, 3.237)             | 1.337 (0.652, 2.743)             |
| Family history of cancer <sup>c</sup>   | 0.936 (0.559, 1.566)             | 1.364 (0.720, 2.581)             |
| Prefer to use only ASL <sup>c</sup>     | 1.294 (0.834, 2.007)             | <b>0.566*</b> (0.325, 0.987)     |

Notes: Boldface indicates statistical significance (\* $p < 0.05$ ; \*\* $p < 0.01$ ; \*\*\* $p < 0.001$ ).

<sup>a</sup>Nonadherence used as a reference category.

<sup>b</sup>Age is a continuous variable.

<sup>c</sup>Reference categories were: white, high school degree or less, lower SES, single, no health insurance, no regular provider, no personal history of cancer, no family history of cancer, and prefer to use both ASL and English.

ASL, American Sign Language.

**Appendix**  
**Deaf Women's Health: Adherence to Breast and Cervical Cancer Screening Recommendations**  
**Kushalnagar et al.**

**Appendix Table 2.** Sociodemographic Characteristics of Overall Age-eligible Sample Who Answered the Cancer Screening Questions<sup>a</sup>

| Variable                              | Pap smear screening<br>(n=1,648) |                                       | $\chi^2$<br>(p-value)     | Mammogram screening<br>(n=1,410) |                                       | $\chi^2$<br>(p-value)               |
|---------------------------------------|----------------------------------|---------------------------------------|---------------------------|----------------------------------|---------------------------------------|-------------------------------------|
|                                       | Adhered<br>(n=1,371)<br>n (%)    | Did not<br>adhere<br>(n=277)<br>n (%) |                           | Adhered<br>(n=1,136)<br>n (%)    | Did not<br>adhere<br>(n=274)<br>n (%) |                                     |
| Age, years, mean (SD)                 | 45 (13)                          | 46 (14)                               | -1.43 <sup>b</sup> (0.15) | 58 (9)                           | 55 (10)                               | <b>4.92<sup>b</sup> (&lt;0.001)</b> |
| BMI, mean (SD)                        | 28 (7)                           | 29 (8)                                | -1.75 <sup>b</sup> (0.08) | 29 (7)                           | 30 (8)                                | -1.39 <sup>b</sup> (0.16)           |
| Race/Ethnicity                        |                                  |                                       | 0.55 (0.76)               |                                  |                                       | 3.54 (0.17)                         |
| White                                 | 866 (65)                         | 176 (65)                              |                           | 732 (68)                         | 188 (72)                              |                                     |
| Black                                 | 267 (20)                         | 50 (19)                               |                           | 225 (21)                         | 41 (16)                               |                                     |
| Hispanic                              | 194 (15)                         | 43 (16)                               |                           | 117 (11)                         | 31 (12)                               |                                     |
| Education                             |                                  |                                       | <b>9.06 (&lt;0.01)</b>    |                                  |                                       | <b>4.65 (&lt;0.04)</b>              |
| High school graduate                  | 567 (42)                         | 141 (52)                              |                           | 575 (51)                         | 158 (58)                              |                                     |
| College graduate                      | 791 (58)                         | 132 (48)                              |                           | 552 (49)                         | 113 (42)                              |                                     |
| Income                                |                                  |                                       | <b>17.73 (&lt;0.001)</b>  |                                  |                                       | <b>5.84 (0.05)</b>                  |
| Low SES                               | 455 (34)                         | 119 (44)                              |                           | 386 (34)                         | 105 (39)                              |                                     |
| Middle SES                            | 587 (43)                         | 118 (43)                              |                           | 484 (43)                         | 122 (45)                              |                                     |
| Upper SES                             | 313 (23)                         | 35 (13)                               |                           | 252 (23)                         | 43 (16)                               |                                     |
| Marital status                        |                                  |                                       | <b>36.21 (&lt;0.001)</b>  |                                  |                                       | <b>9.29 (&lt;0.01)</b>              |
| Single                                | 324 (24)                         | 111 (41)                              |                           | 151 (14)                         | 50 (18)                               |                                     |
| Previously in partnership, now single | 290 (21)                         | 58 (21)                               |                           | 361 (32)                         | 99 (37)                               |                                     |
| In partnership                        | 738 (55)                         | 103 (38)                              |                           | 610 (54)                         | 120 (45)                              |                                     |
| Health insurance                      |                                  |                                       | <b>11.81 (&lt;0.001)</b>  |                                  |                                       | <b>14.50 (&lt;0.001)</b>            |
| Yes                                   | 1,268 (95)                       | 246 (90)                              |                           | 1,066 (96)                       | 244 (91)                              |                                     |
| No/not sure                           | 62 (5)                           | 27 (10)                               |                           | 39 (4)                           | 24 (9)                                |                                     |
| Regular provider                      |                                  |                                       | <b>12.70 (&lt;0.001)</b>  |                                  |                                       | <b>26.77 (&lt;0.001)</b>            |
| Yes                                   | 897 (67)                         | 154 (56)                              |                           | 831 (75)                         | 159 (59)                              |                                     |
| No                                    | 433 (33)                         | 120 (44)                              |                           | 275 (25)                         | 109 (41)                              |                                     |
| Personal history of cancer            |                                  |                                       | 0.66 (0.42)               |                                  |                                       | 3.14 (0.08)                         |

**Appendix**  
**Deaf Women's Health: Adherence to Breast and Cervical Cancer Screening Recommendations**  
**Kushalnagar et al.**

|                          |                          |          |                        |          |
|--------------------------|--------------------------|----------|------------------------|----------|
| Yes                      | 154 (11)                 | 36 (13)  | 223 (20)               | 41 (15)  |
| No                       | 1,206 (89)               | 240 (87) | 906 (80)               | 231 (85) |
| Family history of cancer | 0.03 (0.87)              |          | 2.44 (0.12)            |          |
| Yes                      | 1,012 (75)               | 205 (74) | 848 (76)               | 190 (71) |
| No/Not sure              | 342 (25)                 | 71 (26)  | 275 (24)               | 78 (29)  |
| Hearing status           | <b>12.53 (&lt;0.001)</b> |          | <b>6.58 (&lt;0.01)</b> |          |
| Deaf                     | 415 (30)                 | 114 (41) | 245 (22)               | 79 (29)  |
| Hearing                  | 956 (70)                 | 163 (59) | 891 (78)               | 195 (71) |

<sup>a</sup>Percentages are determined by total number of responses (in parentheses) to each question.

<sup>b</sup>*t*-test.
